# Supplementary material
Source: HighWire-hosted journal article supplement (https://cmajopen.ca/highwire/filestream/81214/field_highwire_adjunct_files/2/2018-0096-3-at.pdf)
Supplement: 2018-0096-3-at.pdf [file 2018-0096-3-at.pdf]

### Appendix 3 (as supplied by the authors): References of all included EHR-Evaluating RCTs

1. Adams, W. G., B. D. Phillips, J. D. Bacic, K. E. Walsh, C. W. Shanahan and M. K. Paasche-Orlow (2014). "Automated conversation system before pediatric primary care visits: a randomized trial." *Pediatrics* **134**(3): e691-699.
2. Adelman, J. S., G. E. Kalkut, C. B. Schechter, J. M. Weiss, M. A. Berger, S. H. Reissman, H. W. Cohen, S. J. Lorenzen, D. A. Burack and W. N. Southern (2013). "Understanding and preventing wrong-patient electronic orders: a randomized controlled trial." *J Am Med Inform Assoc* **20**(2): 305-310.
3. Ali, M. K., K. Singh, D. Kondal, R. Devarajan, S. A. Patel, R. Shivashankar, V. S. Ajay, A. G. Unnikrishnan, V. U. Menon, P. K. Varthakavi, V. Viswanathan, M. Dharmalingam, G. Bantwal, R. K. Sahay, M. Q. Masood, R. Khadgawat, A. Desai, B. Sethi, D. Prabhakaran, K. M. Narayan and N. Tandon (2016). "Effectiveness of a Multicomponent Quality Improvement Strategy to Improve Achievement of Diabetes Care Goals: A Randomized, Controlled Trial." *Ann Intern Med* **165**(6): 399-408.
4. Awdishu, L., C. R. Coates, A. Lyddane, K. Tran, C. E. Daniels, J. Lee and R. El-Kareh (2015). "The impact of real-time alerting on appropriate prescribing in kidney disease: a cluster randomized controlled trial." *J Am Med Inform Assoc*.
5. Azizi, A., R. Aboutorabi, Z. Mazloum-Khorasani, M. Afzal-Aghaee, H. Tabesh and M. Tara (2016). "Evaluating the Effect of Web-Based Iranian Diabetic Personal Health Record App on Self-Care Status and Clinical Indicators: Randomized Controlled Trial." *JMIR Med Inform* **4**(4): e32.
6. Baer, H. J., C. C. Wee, K. DeVito, E. J. Orav, J. P. Frolkis, D. H. Williams, A. Wright and D. W. Bates (2015). "Design of a cluster-randomized trial of electronic health record-based tools to address overweight and obesity in primary care." *Clin Trials* **12**(4): 374-383.
7. Bakerly, N. D., A. Woodcock, J. P. New, J. M. Gibson, W. Wu, D. Leather and J. Vestbo (2015). "The Salford Lung Study protocol: a pragmatic, randomised phase III real-world effectiveness trial in chronic obstructive pulmonary disease." *Respir Res* **16**: 101.
8. Beeler, P. E., E. Eschmann, A. Schumacher, J. D. Studt, B. Amann-Vesti and J. Blaser (2014). "Impact of electronic reminders on venous thromboprophylaxis after admissions and transfers." *J Am Med Inform Assoc* **21**(e2): e297-303.
9. Bell, L. M., R. Grundmeier, R. Localio, J. Zorc, A. G. Fiks, X. Zhang, T. B. Stephens, M. Swietlik and J. P. Guevara (2010). "Electronic health record-based decision support to improve asthma care: a cluster-randomized trial." *Pediatrics* **125**(4): e770-777.
10. Bender, B. G., P. J. Cvietusa, G. K. Goodrich, R. Lowe, H. A. Nuanes, C. Rand, S. Shetterly, C. Tacinas, W. M. Vollmer, N. Wagner, F. S. Wamboldt, S. Xu and D. J. Magid (2015). "Pragmatic trial of health care technologies to improve adherence to pediatric asthma treatment: a randomized clinical trial." *JAMA Pediatr* **169**(4): 317-323.
11. Bernstein, S. L., J. Rosner, M. DeWitt, J. Tetrault, A. L. Hsiao, J. Dziura, S. Sussman, P. O'Connor and B. Toll (2017). "Design and implementation of decision support for tobacco dependence treatment in an inpatient electronic medical record: a randomized trial." *Transl Behav Med* **7**(2): 185-195.
12. Bhardwaja, B., N. M. Carroll, M. A. Raebel, E. A. Chester, E. J. Korner, B. E. Rocho, D. W. Brand and D. J. Magid (2011). "Improving prescribing safety in patients with renal insufficiency in the ambulatory setting: the Drug Renal Alert Pharmacy (DRAP) program." *Pharmacotherapy* **31**(4): 346-356.
13. Bose-Brill, S., M. Kretovics, T. Ballenger, G. Modan, A. Lai, L. Belanger, S. Koesters, T. Pressler-Vydra, C. Holloman and C. Wills (2016). "Testing of a tethered personal health record framework for early end-of-life discussions." *Am J Manag Care* **22**(7): e258-263.
14. Bourgeois, F. C., J. Linder, S. A. Johnson, J. P. Co, J. Fiskio and T. G. Ferris (2010). "Impact of a computerized template on antibiotic prescribing for acute respiratory infections in children and adolescents." *Clin Pediatr (Phila)* **49**(10): 976-983.
15. Carroll, A. E., P. G. Biondich, V. Anand, T. M. Dugan, M. E. Sheley, S. Z. Xu and S. M. Downs (2011). "Targeted screening for pediatric conditions with the CHICA system." *J Am Med Inform Assoc* **18**(4): 485-490.
16. Chiche, L., A. Brescianini, J. Mancini, H. Servy and J. M. Durand (2012). "Evaluation of a prototype electronic personal health record for patients with idiopathic thrombocytopenic purpura." *Patient Prefer Adherence* **6**: 725-734.
17. Chien, A. T., S. Ganeshan, M. A. Schuster, L. S. Lehmann, L. A. Hatfield, K. E. Koplan, C. R. Petty, A. D. Sinaiko, T. D. Sequist and M. B. Rosenthal (2017). "The Effect of Price Information on the Ordering of Images and Procedures." *Pediatrics* **139**(2).
18. Chrischilles, E. A., J. P. Hourcade, W. Doucette, D. Eichmann, B. Gryzlak, R. Lorentzen, K. Wright, E. Letuchy, M. Mueller, K. Farris and B. Levy (2014). "Personal health records: a randomized trial of effects on elder medication safety." *J Am Med Inform Assoc* **21**(4): 679-686.
19. Cintron, A., R. Phillips and M. B. Hamel (2006). "The effect of a web-based, patient-directed intervention on knowledge, discussion, and completion of a health care proxy." *J Palliat Med* **9**(6): 1320-1328.
20. Co, J. P., S. A. Johnson, E. G. Poon, J. Fiskio, S. R. Rao, J. Van Cleave, J. M. Perrin and T. G. Ferris (2010). "Electronic health record decision support and quality of care for children with ADHD." *Pediatrics* **126**(2): 239-246.
21. Conroy, M. B., C. L. Bryce, K. M. McTigue, D. Tudorascu, B. B. Gibbs, D. Comer, R. Hess, K. Huber, L. R. Simkin-Silverman and G. S. Fischer (2017). "Promoting weight maintenance with electronic health record tools in a primary care setting: Baseline results from the MAINTAIN-pc trial." *Contemp Clin Trials* **54**: 60-67.

22. Curtis, L. M., R. J. Mullen, A. Russell, A. Fata, S. C. Bailey, G. Makoul and M. S. Wolf (2016). "An efficacy trial of an electronic health record-based strategy to inform patients on safe medication use: The role of written and spoken communication." *Patient Educ Couns* **99**(9): 1489-1495.
23. Dekarske, B. M., C. R. Zimmerman, R. Chang, P. J. Grant and B. W. Chaffee (2015). "Increased appropriateness of customized alert acknowledgement reasons for overridden medication alerts in a computerized provider order entry system." *Int J Med Inform* **84**(12): 1085-1093.
24. Del Fiol, G., P. J. Haug, J. J. Cimino, S. P. Narus, C. Norlin and J. A. Mitchell (2008). "Effectiveness of topic-specific infobuttons: a randomized controlled trial." *J Am Med Inform Assoc* **15**(6): 752-759.
25. Dexter, P. R., S. Perkins, J. M. Overhage, K. Maharry, R. B. Kohler and C. J. McDonald (2001). "A computerized reminder system to increase the use of preventive care for hospitalized patients." *N Engl J Med* **345**(13): 965-970.
26. Dischinger, H. R., E. Cheng, A. D. Mann, T. M. Grueber, S. Hawk, L. A. Davis, A. V. Prochazka, E. Hutt and L. Caplan (2015). "Decisional support to prevent adverse drug reactions of long latency: pilot randomized controlled intervention for glucocorticoid-induced diabetes." *J Eval Clin Pract* **21**(4): 614-619.
27. Dregan, A., T. P. van Staa, L. McDermott, G. McCann, M. Ashworth, J. Charlton, C. D. Wolfe, A. Rudd, L. Yardley and M. C. Gulliford (2014). "Point-of-care cluster randomized trial in stroke secondary prevention using electronic health records." *Stroke* **45**(7): 2066-2071.
28. Druss, B. G., X. Ji, G. Glick and S. A. von Esenwein (2014). "Randomized trial of an electronic personal health record for patients with serious mental illnesses." *Am J Psychiatry* **171**(3): 360-368.
29. Duke, J. D., X. Li and P. Dexter (2013). "Adherence to drug-drug interaction alerts in high-risk patients: a trial of context-enhanced alerting." *J Am Med Inform Assoc* **20**(3): 494-498.
30. Embi, P. J. and A. C. Leonard (2012). "Evaluating alert fatigue over time to EHR-based clinical trial alerts: findings from a randomized controlled study." *J Am Med Inform Assoc* **19**(e1): e145-148.
31. Federman, A. D., N. Kil, J. Kannry, E. Andreopolous, W. Toribio, J. Lyons, M. Singer, A. Yartel, B. D. Smith, D. B. Rein and K. Krauskopf (2017). "An Electronic Health Record-based Intervention to Promote Hepatitis C Virus Testing Among Adults Born Between 1945 and 1965: A Cluster-randomized Trial." *Med Care* **55**(6): 590-597.
32. Feldstein, A., P. J. Elmer, D. H. Smith, M. Herson, E. Orwoll, C. Chen, M. Aickin and M. C. Swain (2006). "Electronic medical record reminder improves osteoporosis management after a fracture: a randomized, controlled trial." *J Am Geriatr Soc* **54**(3): 450-457.
33. Feldstein, A. C., D. H. Smith, N. Perrin, X. Yang, M. Rix, M. A. Raebel, D. J. Magid, S. R. Simon and S. B. Soumerai (2006). "Improved therapeutic monitoring with several interventions: a randomized trial." *Arch Intern Med* **166**(17): 1848-1854.
34. Field, T. S., P. Rochon, M. Lee, L. Gavendo, J. L. Baril and J. H. Gurwitz (2009). "Computerized clinical decision support during medication ordering for long-term care residents with renal insufficiency." *J Am Med Inform Assoc* **16**(4): 480-485.
35. Fiks, A. G., K. F. Hunter, A. R. Localio, R. W. Grundmeier, T. Bryant-Stephens, A. A. Luberti, L. M. Bell and E. A. Alessandrini (2009). "Impact of electronic health record-based alerts on influenza vaccination for children with asthma." *Pediatrics* **124**(1): 159-169.
36. Fiks, A. G., S. L. Mayne, D. J. Karavite, A. Suh, R. O'Hara, A. R. Localio, M. Ross and R. W. Grundmeier (2015). "Parent-reported outcomes of a shared decision-making portal in asthma: a practice-based RCT." *Pediatrics* **135**(4): e965-973.
37. Forrest, C. B., A. G. Fiks, L. C. Bailey, R. Localio, R. W. Grundmeier, T. Richards, D. J. Karavite, L. Elden and E. A. Alessandrini (2013). "Improving adherence to otitis media guidelines with clinical decision support and physician feedback." *Pediatrics* **131**(4): e1071-1081.
38. Fortuna, R. J., F. Zhang, D. Ross-Degnan, F. X. Campion, J. A. Finkelstein, J. B. Kotch, A. C. Feldstein, D. H. Smith and S. R. Simon (2009). "Reducing the prescribing of heavily marketed medications: a randomized controlled trial." *J Gen Intern Med* **24**(8): 897-903.
39. Friction, J., D. B. Rindal, W. Rush, T. Flottemesch, G. Vazquez, M. J. Thoele, E. Durand, C. Enstad and N. Rhodus (2011). "The effect of electronic health records on the use of clinical care guidelines for patients with medically complex conditions." *J Am Dent Assoc* **142**(10): 1133-1142.
40. Ghadie, A. S., G. N. Hamadeh, D. M. Mahmassani and N. A. Lakkis (2015). "The effect of various types of patients' reminders on the uptake of pneumococcal vaccine in adults: A randomized controlled trial." *Vaccine* **33**(43): 5868-5872.
41. Gill, J. M., Y. X. Chen, J. J. Glutting, J. J. Diamond and M. I. Lieberman (2009). "Impact of decision support in electronic medical records on lipid management in primary care." *Popul Health Manag* **12**(5): 221-226.
42. Gill, J. M., A. G. Mainous, 3rd, R. J. Koopman, M. S. Player, C. J. Everett, Y. X. Chen, J. J. Diamond and M. I. Lieberman (2011). "Impact of EHR-based clinical decision support on adherence to guidelines for patients on NSAIDs: a randomized controlled trial." *Ann Fam Med* **9**(1): 22-30.
43. Gjelstad, S., S. Høy, J. Straand, M. Brekke, I. Dalen and M. Lindbaek (2013). "Improving antibiotic prescribing in acute respiratory tract infections: cluster randomised trial from Norwegian general practice (prescription peer academic detailing (Rx-PAD) study)." *BMJ* **347**: f4403.
44. Goldberg, H. I., D. S. Lessler, K. Mertens, T. A. Eytan and A. D. Cheadle (2004). "Self-management support in a web-based medical record: a pilot randomized controlled trial." *Jt Comm J Qual Saf* **30**(11): 629-635, 589.

45. Grant, R. W., J. S. Wald, J. L. Schnipper, T. K. Gandhi, E. G. Poon, E. J. Orav, D. H. Williams, L. A. Volk and B. Middleton (2008). "Practice-linked online personal health records for type 2 diabetes mellitus: a randomized controlled trial." *Arch Intern Med* **168**(16): 1776-1782.
46. Graumlich, J. F., H. Wang, A. Madison, M. S. Wolf, D. Kaiser, K. Dahal and D. G. Morrow (2016). "Effects of a Patient-Provider, Collaborative, Medication-Planning Tool: A Randomized, Controlled Trial." *J Diabetes Res* **2016**: 2129838.
47. Green, B. B., J. D. Ralston, P. A. Fishman, S. L. Catz, A. Cook, J. Carlson, L. Tyll, D. Carrell and R. S. Thompson (2008). "Electronic communications and home blood pressure monitoring (e-BP) study: design, delivery, and evaluation framework." *Contemp Clin Trials* **29**(3): 376-395.
48. Greenwood, D. A., S. A. Blozis, H. M. Young, T. S. Nesbitt and C. C. Quinn (2015). "Overcoming Clinical Inertia: A Randomized Clinical Trial of a Telehealth Remote Monitoring Intervention Using Paired Glucose Testing in Adults With Type 2 Diabetes." *J Med Internet Res* **17**(7): e178.
49. Gude, W. T., M. M. van Engen-Verheul, S. N. van der Veer, H. M. C. Kemps, M. W. M. Jaspers, N. F. de Keizer and N. Peek (2016). "Effect of a web-based audit and feedback intervention with outreach visits on the clinical performance of multidisciplinary teams: a cluster-randomized trial in cardiac rehabilitation." *Implementation Science : IS* **11**: 160.
50. Guiriguet, C., L. Munoz-Ortiz, A. Buron, I. Rivero, J. Grau, C. Vela-Vallespin, M. Vilarrubi, M. Torres, C. Hernandez, L. Mendez-Boo, P. Toran, L. Caballeria, F. Macia and A. Castells (2016). "Alerts in electronic medical records to promote a colorectal cancer screening programme: a cluster randomised controlled trial in primary care." *Br J Gen Pract* **66**(648): e483-490.
51. Gulliford, M. C., T. van Staa, A. Dregan, L. McDermott, G. McCann, M. Ashworth, J. Charlton, P. Little, M. V. Moore and L. Yardley (2014). "Electronic health records for intervention research: a cluster randomized trial to reduce antibiotic prescribing in primary care (eCRT study)." *Ann Fam Med* **12**(4): 344-351.
52. Gupta, A., P. Gholami, M. P. Turakhia, K. Friday and P. A. Heidenreich (2014). "Clinical reminders to providers of patients with reduced left ventricular ejection fraction increase defibrillator referral: a randomized trial." *Circ Heart Fail* **7**(1): 140-145.
53. Gurwitz, J. H., T. S. Field, J. Ogarek, J. Tjia, S. L. Cutrona, L. R. Harrold, S. J. Gagne, P. Preusse, J. L. Donovan, A. O. Kanaan, G. Reed and L. Garber (2014). "An electronic health record-based intervention to increase follow-up office visits and decrease rehospitalization in older adults." *J Am Geriatr Soc* **62**(5): 865-871.
54. Hannon, T. S., T. M. Dugan, C. K. Saha, S. J. McKee, S. M. Downs and A. E. Carroll (2017). "Effectiveness of Computer Automation for the Diagnosis and Management of Childhood Type 2 Diabetes: A Randomized Clinical Trial." *JAMA Pediatr* **171**(4): 327-334.
55. Hansagi, H., M. Olsson, A. Hussain and G. Ohlen (2008). "Is information sharing between the emergency department and primary care useful to the care of frequent emergency department users?" *Eur J Emerg Med* **15**(1): 34-39.
56. Herrett, E., E. Williamson, T. van Staa, M. Ranopa, C. Free, T. Chadborn, B. Goldacre and L. Smeeth (2016). "Text messaging reminders for influenza vaccine in primary care: a cluster randomised controlled trial (TXT4FLUJAB)." *BMJ Open* **6**(2): e010069.
57. Holbrook, A., K. Keshavjee, H. Lee, B. Bernstein, D. Chan, L. Thabane, H. Gerstein and S. Troyan (2005). "Individualized electronic decision support and reminders can improve diabetes care in the community." *AMIA Annu Symp Proc*: 982.
58. Holbrook, A., E. Pullenayegum, L. Thabane, S. Troyan, G. Foster, K. Keshavjee, D. Chan, L. Dolovich, H. Gerstein, C. Demers and G. Curnew (2011). "Shared electronic vascular risk decision support in primary care: Computerization of Medical Practices for the Enhancement of Therapeutic Effectiveness (COMPETE III) randomized trial." *Arch Intern Med* **171**(19): 1736-1744.
59. Holmes, J. F., J. Freilich, S. L. Taylor and D. Buettner (2015). "Electronic alerts for triage protocol compliance among emergency department triage nurses: a randomized controlled trial." *Nurs Res* **64**(3): 226-230.
60. Holt, T. A., M. Thorogood, F. Griffiths, S. Munday, T. Friede and D. Stables (2010). "Automated electronic reminders to facilitate primary cardiovascular disease prevention: randomised controlled trial." *Br J Gen Pract* **60**(573): e137-143.
61. Hooper, M. H., L. Weavind, A. P. Wheeler, J. B. Martin, S. S. Gowda, M. W. Semler, R. M. Hayes, D. W. Albert, N. B. Deane, H. Nian, J. L. Mathe, A. Nadas, J. Sztipanovits, A. Miller, G. R. Bernard and T. W. Rice (2012). "Randomized trial of automated, electronic monitoring to facilitate early detection of sepsis in the intensive care unit\*." *Crit Care Med* **40**(7): 2096-2101.
62. Hsu, L., C. L. Bowlus, S. L. Stewart, T. T. Nguyen, J. Dang, B. Chan and M. S. Chen, Jr. (2013). "Electronic messages increase hepatitis B screening in at-risk Asian American patients: a randomized, controlled trial." *Dig Dis Sci* **58**(3): 807-814.
63. Hu, X., X. Zhu and L. Gao (2014). "Intensive nursing care by an electronic followup system to promote secondary prevention after percutaneous coronary intervention: a randomized trial." *J Cardiopulm Rehabil Prev* **34**(6): 396-405.
64. Humphrey, L. L., J. Shannon, M. R. Partin, J. O'Malley, Z. Chen and M. Helfand (2011). "Improving the follow-up of positive hemocult screening tests: an electronic intervention." *J Gen Intern Med* **26**(7): 691-697.
65. Kashiwagi, K. and S. Tsukahara (2014). "Impact of patient access to Internet health records on glaucoma medication: randomized controlled trial." *J Med Internet Res* **16**(1): e15.

66. Kilgore, M. L., R. Outman, J. L. Locher, J. J. Allison, A. Mudano, B. Kitchin, K. G. Saag and J. R. Curtis (2013). "Multimodal intervention to improve osteoporosis care in home health settings: results from a cluster randomized trial." *Osteoporos Int* **24**(10): 2555-2560.
67. Kortteisto, T., J. Raitanen, J. Komulainen, I. Kunnamo, M. Makela, P. Rissanen and M. Kaila (2014). "Patient-specific computer-based decision support in primary healthcare--a randomized trial." *Implement Sci* **9**: 15.
68. Krall, M. A., K. Traunweiser and W. Towery (2004). "Effectiveness of an electronic medical record clinical quality alert prepared by off-line data analysis." *Stud Health Technol Inform* **107**(Pt 1): 135-139.
69. Krist, A. H., S. H. Woolf, S. F. Rothemich, R. E. Johnson, J. E. Peele, T. D. Cunningham, D. R. Longo, G. A. Bello and G. R. Matzke (2012). "Interactive preventive health record to enhance delivery of recommended care: a randomized trial." *Ann Fam Med* **10**(4): 312-319.
70. Kucher, N., S. Koo, R. Quiroz, J. M. Cooper, M. D. Paterno, B. Soukonnikov and S. Z. Goldhaber (2005). "Electronic alerts to prevent venous thromboembolism among hospitalized patients." *N Engl J Med* **352**(10): 969-977.
71. Kuilboer, M. M., M. A. van Wijk, M. Mosseveld, E. van der Does, J. C. de Jongste, S. E. Overbeek, B. Ponsioen and J. van der Lei (2006). "Computed critiquing integrated into daily clinical practice affects physicians' behavior--a randomized clinical trial with AsthmaCritic." *Methods Inf Med* **45**(4): 447-454.
72. Lang, E., M. Afilalo, A. C. Vandal, J. F. Boivin, X. Xue, A. Colacone, R. Leger, I. Shrier and S. Rosenthal (2006). "Impact of an electronic link between the emergency department and family physicians: a randomized controlled trial." *CMAJ* **174**(3): 313-318.
73. Lau, A. Y., A. Arguel, S. Dennis, S. T. Liaw and E. Coiera (2015). ""Why Didn't it Work?" Lessons From a Randomized Controlled Trial of a Web-based Personally Controlled Health Management System for Adults with Asthma." *J Med Internet Res* **17**(12): e283.
74. Lau, A. Y., V. Sintchenko, J. Crimmins, F. Magrabi, B. Gallego and E. Coiera (2012). "Impact of a web-based personally controlled health management system on influenza vaccination and health services utilization rates: a randomized controlled trial." *J Am Med Inform Assoc* **19**(5): 719-727.
75. Lester, W. T., R. W. Grant, G. O. Barnett and H. C. Chueh (2006). "Randomized controlled trial of an informatics-based intervention to increase statin prescription for secondary prevention of coronary disease." *J Gen Intern Med* **21**(1): 22-29.
76. Lin, C. J., M. P. Nowalk, V. N. Pavlik, A. E. Brown, S. Zhang, J. M. Raviotta, K. K. Moehling, M. Hawk, E. M. Ricci, D. B. Middleton, S. Patel, J. E. South-Paul and R. K. Zimmerman (2016). "Using the 4 pillars practice transformation program to increase adult influenza vaccination and reduce missed opportunities in a randomized cluster trial." *BMC Infect Dis* **16**(1): 623.
77. Lin, Y. F., L. H. Sheng, M. Y. Wu, C. M. Zheng, T. J. Chang, Y. C. Li, Y. H. Huang and H. P. Lu (2014). "A study of renal function influence by integrating cloud-based manometers and physician order entry systems." *J Chin Med Assoc* **77**(12): 642-647.
78. Linder, J. A., N. A. Rigotti, L. I. Schneider, J. H. Kelley, P. Brawarsky and J. S. Haas (2009). "An electronic health record-based intervention to improve tobacco treatment in primary care: a cluster-randomized controlled trial." *Arch Intern Med* **169**(8): 781-787.
79. Linder, J. A., J. L. Schnipper, R. Tsurikova, D. T. Yu, L. A. Volk, A. J. Melnikas, M. B. Palchuk, M. Olsha-Yehiav and B. Middleton (2010). "Electronic health record feedback to improve antibiotic prescribing for acute respiratory infections." *Am J Manag Care* **16**(12 Suppl HIT): e311-319.
80. Linder, J. A., J. L. Schnipper, R. Tsurikova, T. Yu, L. A. Volk, A. J. Melnikas, M. B. Palchuk, M. Olsha-Yehiav and B. Middleton (2009). "Documentation-based clinical decision support to improve antibiotic prescribing for acute respiratory infections in primary care: a cluster randomised controlled trial." *Inform Prim Care* **17**(4): 231-240.
81. Lo, H. G., M. E. Matheny, D. L. Seger, D. W. Bates and T. K. Gandhi (2009). "Impact of non-interruptive medication laboratory monitoring alerts in ambulatory care." *J Am Med Inform Assoc* **16**(1): 66-71.
82. Loo, T. S., R. B. Davis, L. A. Lipsitz, J. Irish, C. K. Bates, K. Agarwal, L. Markson and M. B. Hamel (2011). "Electronic medical record reminders and panel management to improve primary care of elderly patients." *Arch Intern Med* **171**(17): 1552-1558.
83. Maddocks, H., M. Stewart, A. Thind, A. L. Terry, V. Chevendra, J. N. Marshall, L. B. Denomme and S. Cejic (2011). "Feedback and training tool to improve provision of preventive care by physicians using EMRs: a randomised control trial." *Inform Prim Care* **19**(3): 147-153.
84. Matheny, M. E., T. K. Gandhi, E. J. Orav, Z. Ladak-Merchant, D. W. Bates, G. J. Kuperman and E. G. Poon (2007). "Impact of an automated test results management system on patients' satisfaction about test result communication." *Arch Intern Med* **167**(20): 2233-2239.
85. Matheny, M. E., T. D. Sequist, A. C. Seger, J. M. Fiskio, M. Sperling, D. Bugbee, D. W. Bates and T. K. Gandhi (2008). "A randomized trial of electronic clinical reminders to improve medication laboratory monitoring." *J Am Med Inform Assoc* **15**(4): 424-429.
86. Matthews, D. E., S. J. Beatty, G. M. Grever, A. Lehman and K. D. Barnes (2016). "Comparison of 2 Population Health Management Approaches to Increase Vitamin B12 Monitoring in Patients Taking Metformin." *Ann Pharmacother* **50**(10): 840-846.
87. Mayne, S. L., N. E. duRivage, K. A. Feemster, A. R. Localio, R. W. Grundmeier and A. G. Fiks (2014). "Effect of decision support on missed opportunities for human papillomavirus vaccination." *Am J Prev Med* **47**(6): 734-744.

88. McCarrier, K. P., J. D. Ralston, I. B. Hirsch, G. Lewis, D. P. Martin, F. J. Zimmerman and H. I. Goldberg (2009). "Web-based collaborative care for type 1 diabetes: a pilot randomized trial." *Diabetes Technol Ther* **11**(4): 211-217.
89. McGinn, T. G., L. McCullagh, J. Kannry, M. Knaus, A. Sofianou, J. P. Wisnivesky and D. M. Mann (2013). "Efficacy of an evidence-based clinical decision support in primary care practices: a randomized clinical trial." *JAMA Intern Med* **173**(17): 1584-1591.
90. Meeker, D., J. A. Linder, C. R. Fox, M. W. Friedberg, S. D. Persell, N. J. Goldstein, T. K. Knight, J. W. Hay and J. N. Doctor (2016). "Effect of Behavioral Interventions on Inappropriate Antibiotic Prescribing Among Primary Care Practices: A Randomized Clinical Trial." *JAMA* **315**(6): 562-570.
91. Mertens, J. R., F. W. Chi, C. M. Weisner, D. D. Satre, T. B. Ross, S. Allen, D. Pating, C. I. Campbell, Y. W. Lu and S. A. Sterling (2015). "Physician versus non-physician delivery of alcohol screening, brief intervention and referral to treatment in adult primary care: the ADVISE cluster randomized controlled implementation trial." *Addict Sci Clin Pract* **10**: 26.
92. Meystre, S. M. and P. J. Haug (2008). "Randomized controlled trial of an automated problem list with improved sensitivity." *Int J Med Inform* **77**(9): 602-612.
93. Mitchell, E., F. Sullivan, J. M. Grimshaw, P. T. Donnan and G. Watt (2005). "Improving management of hypertension in general practice: a randomised controlled trial of feedback derived from electronic patient data." *Br J Gen Pract* **55**(511): 94-101.
94. Muller, D., J. Logan, D. Dorr and D. Mosen (2009). "The effectiveness of a secure email reminder system for colorectal cancer screening." *AMIA Annu Symp Proc* **2009**: 457-461.
95. Munck, L. K., K. R. Hansen, A. G. Molbak, H. Balle and S. Kongsgren (2014). "The use of shared medication record as part of medication reconciliation at hospital admission is feasible." *Dan Med J* **61**(5): A4817.
96. Murphy, D. R., L. Wu, E. J. Thomas, S. N. Forjuoh, A. N. Meyer and H. Singh (2015). "Electronic Trigger-Based Intervention to Reduce Delays in Diagnostic Evaluation for Cancer: A Cluster Randomized Controlled Trial." *J Clin Oncol* **33**(31): 3560-3567.
97. Murray, M. D., L. E. Harris, J. M. Overhage, X. H. Zhou, G. J. Eckert, F. E. Smith, N. N. Buchanan, F. D. Wolinsky, C. J. McDonald and W. M. Tierney (2004). "Failure of computerized treatment suggestions to improve health outcomes of outpatients with uncomplicated hypertension: results of a randomized controlled trial." *Pharmacotherapy* **24**(3): 324-337.
98. Nagykaldi, Z., C. B. Aspy, A. Chou and J. W. Mold (2012). "Impact of a Wellness Portal on the delivery of patient-centered preventive care." *J Am Board Fam Med* **25**(2): 158-167.
99. Nahm, E. S., C. Diblasi, E. Gonzales, K. Silver, S. Zhu, K. Sagherian and K. Kongs (2017). "Patient-Centered Personal Health Record and Portal Implementation Toolkit for Ambulatory Clinics: A Feasibility Study." *Comput Inform Nurs* **35**(4): 176-185.
100. Noel, H. C., D. C. Vogel, J. J. Erdos, D. Cornwall and F. Levin (2004). "Home telehealth reduces healthcare costs." *Telemed J E Health* **10**(2): 170-183.
101. O'Connor, P. J., D. J. Magid, J. M. Sperl-Hillen, D. W. Price, S. E. Asche, W. A. Rush, H. L. Ekstrom, D. W. Brand, H. M. Tavel, O. V. Godlevsky, P. E. Johnson and K. L. Margolis (2014). "Personalised physician learning intervention to improve hypertension and lipid control: randomised trial comparing two methods of physician profiling." *BMJ Qual Saf* **23**(12): 1014-1022.
102. O'Connor, P. J., J. M. Sperl-Hillen, W. A. Rush, P. E. Johnson, G. H. Amundson, S. E. Asche, H. L. Ekstrom and T. P. Gilmer (2011). "Impact of electronic health record clinical decision support on diabetes care: a randomized trial." *Ann Fam Med* **9**(1): 12-21.
103. Otsuka, S. H., N. H. Tayal, K. Porter, P. J. Embi and S. J. Beatty (2013). "Improving herpes zoster vaccination rates through use of a clinical pharmacist and a personal health record." *Am J Med* **126**(9): 832 e831-836.
104. Overhage, J. M., P. R. Dexter, S. M. Perkins, W. H. Cordell, J. McGoff, R. McGrath and C. J. McDonald (2002). "A randomized, controlled trial of clinical information shared from another institution." *Ann Emerg Med* **39**(1): 14-23.
105. Palen, T. E., D. W. Price, A. J. Snyder and S. M. Shetterly (2010). "Computerized alert reduced D-dimer testing in the elderly." *Am J Manag Care* **16**(11): e267-275.
106. Palen, T. E., M. Raebel, E. Lyons and D. M. Magid (2006). "Evaluation of laboratory monitoring alerts within a computerized physician order entry system for medication orders." *Am J Manag Care* **12**(7): 389-395.
107. Persell, S. D., D. M. Lloyd-Jones, E. M. Friesema, A. J. Cooper and D. W. Baker (2013). "Electronic health record-based patient identification and individualized mailed outreach for primary cardiovascular disease prevention: a cluster randomized trial." *J Gen Intern Med* **28**(4): 554-560.
108. Peterson, J. F., B. P. Rosenbaum, L. R. Waitman, R. Habermann, J. Powers, D. Harrell and R. A. Miller (2007). "Physicians' response to guided geriatric dosing: initial results from a randomized trial." *Stud Health Technol Inform* **129**(Pt 2): 1037-1040.
109. Player, M. S., J. M. Gill, A. G. Mainous, 3rd, C. J. Everett, R. J. Koopman, J. J. Diamond, M. I. Lieberman and Y. X. Chen (2010). "An electronic medical record-based intervention to improve quality of care for gastro-esophageal reflux disease (GERD) and atypical presentations of GERD." *Qual Prim Care* **18**(4): 223-229.
110. Price, M., I. Davies, R. Rusk, M. Lesperance and J. Weber (2017). "Applying STOPP Guidelines in Primary Care Through Electronic Medical Record Decision Support: Randomized Control Trial Highlighting the Importance of Data Quality." *JMIR Med Inform* **5**(2): e15.

111. Proeschold-Bell, R. J., C. M. Belden, H. Parnell, S. Cohen, M. Cromwell and F. Lombard (2010). "A randomized controlled trial of health information exchange between human immunodeficiency virus institutions." *J Public Health Manag Pract* **16**(6): 521-528.
112. Raebel, M. A., N. M. Carroll, J. A. Kelleher, E. A. Chester, S. Berga and D. J. Magid (2007). "Randomized trial to improve prescribing safety during pregnancy." *J Am Med Inform Assoc* **14**(4): 440-450.
113. Raebel, M. A., J. Charles, J. Dugan, N. M. Carroll, E. J. Korner, D. W. Brand and D. J. Magid (2007). "Randomized trial to improve prescribing safety in ambulatory elderly patients." *J Am Geriatr Soc* **55**(7): 977-985.
114. Ralston, J. D., I. B. Hirsch, J. Hoath, M. Mullen, A. Cheadle and H. I. Goldberg (2009). "Web-based collaborative care for type 2 diabetes: a pilot randomized trial." *Diabetes Care* **32**(2): 234-239.
115. Rathlev, N., R. Almomen, A. Deutsch, H. Smithline, H. Li and P. Visintainer (2016). "Randomized Controlled Trial of Electronic Care Plan Alerts and Resource Utilization by High Frequency Emergency Department Users with Opioid Use Disorder." *West J Emerg Med* **17**(1): 28-34.
116. Rollman, B. L., B. H. Hanusa, T. Gilbert, H. J. Lowe, W. N. Kapoor and H. C. Schulberg (2001). "The electronic medical record. A randomized trial of its impact on primary care physicians' initial management of major depression [corrected]." *Arch Intern Med* **161**(2): 189-197.
117. Rood, E., R. J. Bosman, J. I. van der Spoel, P. Taylor and D. F. Zandstra (2005). "Use of a computerized guideline for glucose regulation in the intensive care unit improved both guideline adherence and glucose regulation." *J Am Med Inform Assoc* **12**(2): 172-180.
118. Ross, S. E., L. A. Moore, M. A. Earnest, L. Wittevrongel and C. T. Lin (2004). "Providing a web-based online medical record with electronic communication capabilities to patients with congestive heart failure: randomized trial." *J Med Internet Res* **6**(2): e12.
119. Rothschild, J. M., S. McGurk, M. Honour, L. Lu, A. A. McClendon, P. Srivastava, W. H. Churchill, R. M. Kaufman, J. Avorn, E. F. Cook and D. W. Bates (2007). "Assessment of education and computerized decision support interventions for improving transfusion practice." *Transfusion* **47**(2): 228-239.
120. Ryan, A. M., C. M. McCullough, S. C. Shih, J. J. Wang, M. S. Ryan and L. P. Casalino (2014). "The intended and unintended consequences of quality improvement interventions for small practices in a community-based electronic health record implementation project." *Med Care* **52**(9): 826-832.
121. Schnipper, J. L., T. K. Gandhi, J. S. Wald, R. W. Grant, E. G. Poon, L. A. Volk, A. Businger, D. H. Williams, E. Siteman, L. Buckel and B. Middleton (2012). "Effects of an online personal health record on medication accuracy and safety: a cluster-randomized trial." *J Am Med Inform Assoc* **19**(5): 728-734.
122. Schnipper, J. L., C. Hamann, C. D. Ndumele, C. L. Liang, M. G. Carty, A. S. Karson, I. Bhan, C. M. Coley, E. Poon, A. Turchin, S. A. Labonville, E. K. Diedrichsen, S. Lipsitz, C. A. Broverman, P. McCarthy and T. K. Gandhi (2009). "Effect of an electronic medication reconciliation application and process redesign on potential adverse drug events: a cluster-randomized trial." *Arch Intern Med* **169**(8): 771-780.
123. Schnipper, J. L., C. L. Liang, C. D. Ndumele and M. L. Pendergrass (2010). "Effects of a computerized order set on the inpatient management of hyperglycemia: a cluster-randomized controlled trial." *Endocr Pract* **16**(2): 209-218.
124. Schnipper, J. L., J. A. Linder, M. B. Palchuk, D. T. Yu, K. E. McColgan, L. A. Volk, R. Tsurikova, A. J. Melnikas, J. S. Einbinder and B. Middleton (2010). "Effects of documentation-based decision support on chronic disease management." *Am J Manag Care* **16**(12 Suppl HIT): SP72-81.
125. Schriefer, S. P., S. E. Landis, D. J. Turbow and S. C. Patch (2009). "Effect of a computerized body mass index prompt on diagnosis and treatment of adult obesity." *Fam Med* **41**(7): 502-507.
126. Sedrak, M. S., J. S. Myers, D. S. Small, I. Nachamkin, J. B. Ziemba, D. Murray, G. W. Kurtzman, J. Zhu, W. Wang, D. Mincarelli, D. Danoski, B. P. Wells, J. S. Berns, P. J. Brennan, C. W. Hanson, C. J. Dine and M. S. Patel (2017). "Effect of a Price Transparency Intervention in the Electronic Health Record on Clinician Ordering of Inpatient Laboratory Tests: The PRICE Randomized Clinical Trial." *JAMA Intern Med* **177**(7): 939-945.
127. Sequist, T. D., T. K. Gandhi, A. S. Karson, J. M. Fiskio, D. Bugbee, M. Sperling, E. F. Cook, E. J. Orav, D. G. Fairchild and D. W. Bates (2005). "A randomized trial of electronic clinical reminders to improve quality of care for diabetes and coronary artery disease." *J Am Med Inform Assoc* **12**(4): 431-437.
128. Sequist, T. D., A. M. Zaslavsky, G. A. Colditz and J. Z. Ayanian (2011). "Electronic patient messages to promote colorectal cancer screening: a randomized controlled trial." *Arch Intern Med* **171**(7): 636-641.
129. Smith, J. R., M. J. Noble, S. Musgrave, J. Murdoch, G. M. Price, G. R. Barton, J. Windley, R. Holland, B. D. Harrison, A. Howe, D. B. Price, I. Harvey and A. M. Wilson (2012). "The at-risk registers in severe asthma (ARRISA) study: a cluster-randomised controlled trial examining effectiveness and costs in primary care." *Thorax* **67**(12): 1052-1060.
130. Steventon, A., M. Bardsley, H. Doll, E. Tuckey and S. P. Newman (2014). "Effect of telehealth on glycaemic control: analysis of patients with type 2 diabetes in the Whole Systems Demonstrator cluster randomised trial." *BMC Health Serv Res* **14**: 334.
131. Stockwell, M. S., M. Catalozzi, S. Camargo, R. Ramakrishnan, S. Holleran, S. E. Findley, R. Kukafka, A. M. Hofstetter, N. Fernandez and D. K. Vawdrey (2015). "Registry-linked electronic influenza vaccine provider reminders: a cluster-crossover trial." *Pediatrics* **135**(1): e75-82.
132. Stockwell, M. S., E. O. Kharbanda, R. A. Martinez, C. Y. Vargas, D. K. Vawdrey and S. Camargo (2012). "Effect of a text messaging intervention on influenza vaccination in an urban, low-income pediatric and adolescent population: a randomized controlled trial." *JAMA* **307**(16): 1702-1708.

133. Strom, B. L., R. Schinnar, F. Abera, W. Bilker, S. Hennessy, C. E. Leonard and E. Pifer (2010). "Unintended effects of a computerized physician order entry nearly hard-stop alert to prevent a drug interaction: a randomized controlled trial." *Arch Intern Med* **170**(17): 1578-1583.
134. Strom, B. L., R. Schinnar, W. Bilker, S. Hennessy, C. E. Leonard and E. Pifer (2010). "Randomized clinical trial of a customized electronic alert requiring an affirmative response compared to a control group receiving a commercial passive CPOE alert: NSAID--warfarin co-prescribing as a test case." *J Am Med Inform Assoc* **17**(4): 411-415.
135. Subramanian, U., S. D. Fihn, M. Weinberger, L. Plue, F. E. Smith, E. M. Udris, M. B. McDonell, G. J. Eckert, M. Temkit, X. H. Zhou, L. Chen and W. M. Tierney (2004). "A controlled trial of including symptom data in computer-based care suggestions for managing patients with chronic heart failure." *Am J Med* **116**(6): 375-384.
136. Szilagyi, P. G., J. R. Serwint, S. G. Humiston, C. M. Rand, S. Schaffer, P. Vincelli, N. Dhepyasuwan, A. Blumkin, C. Albertin and C. R. Curtis (2015). "Effect of provider prompts on adolescent immunization rates: a randomized trial." *Acad Pediatr* **15**(2): 149-157.
137. Tamblyn, R., T. Eguale, D. L. Buckeridge, A. Huang, J. Hanley, K. Reidel, S. Shi and N. Winslade (2012). "The effectiveness of a new generation of computerized drug alerts in reducing the risk of injury from drug side effects: a cluster randomized trial." *J Am Med Inform Assoc* **19**(4): 635-643.
138. Tamblyn, R., P. Ernst, N. Winslade, A. Huang, R. Grad, R. W. Platt, S. Ahmed, T. Moraga and T. Eguale (2015). "Evaluating the impact of an integrated computer-based decision support with person-centered analytics for the management of asthma in primary care: a randomized controlled trial." *J Am Med Inform Assoc* **22**(4): 773-783.
139. Tamblyn, R., A. Huang, L. Taylor, Y. Kawasumi, G. Bartlett, R. Grad, A. Jacques, M. Dawes, M. Abrahamowicz, R. Perreault, N. Winslade, L. Poissant and A. Pinsonneault (2008). "A randomized trial of the effectiveness of on-demand versus computer-triggered drug decision support in primary care." *J Am Med Inform Assoc* **15**(4): 430-438.
140. Tamblyn, R., K. Reidel, A. Huang, L. Taylor, N. Winslade, G. Bartlett, R. Grad, A. Jacques, M. Dawes, P. Laroche and A. Pinsonneault (2010). "Increasing the detection and response to adherence problems with cardiovascular medication in primary care through computerized drug management systems: a randomized controlled trial." *Med Decis Making* **30**(2): 176-188.
141. Tang, J. W., R. F. Kushner, K. A. Cameron, B. Hicks, A. J. Cooper and D. W. Baker (2012). "Electronic tools to assist with identification and counseling for overweight patients: a randomized controlled trial." *J Gen Intern Med* **27**(8): 933-939.
142. Tang, P. C., J. M. Overhage, A. S. Chan, N. L. Brown, B. Aghighi, M. P. Entwistle, S. L. Hui, S. M. Hyde, L. H. Klieman, C. J. Mitchell, A. J. Perkins, L. S. Qureshi, T. A. Waltmyer, L. J. Winters and C. Y. Young (2013). "Online disease management of diabetes: engaging and motivating patients online with enhanced resources-diabetes (EMPOWER-D), a randomized controlled trial." *J Am Med Inform Assoc* **20**(3): 526-534.
143. Terrell, K. M., A. J. Perkins, S. L. Hui, C. M. Callahan, P. R. Dexter and D. K. Miller (2010). "Computerized decision support for medication dosing in renal insufficiency: a randomized, controlled trial." *Ann Emerg Med* **56**(6): 623-629.
144. Tierney, W. M., J. M. Overhage, M. D. Murray, L. E. Harris, X. H. Zhou, G. J. Eckert, F. E. Smith, N. Nienaber, C. J. McDonald and F. D. Wolinsky (2003). "Effects of computerized guidelines for managing heart disease in primary care." *J Gen Intern Med* **18**(12): 967-976.
145. Tornvall, E., L. K. Wahren and S. Wilhelmsson (2009). "Advancing nursing documentation--an intervention study using patients with leg ulcer as an example." *Int J Med Inform* **78**(9): 605-617.
146. Toth-Pal, E., G. H. Nilsson and A. K. Furhoff (2004). "Clinical effect of computer generated physician reminders in health screening in primary health care--a controlled clinical trial of preventive services among the elderly." *Int J Med Inform* **73**(9-10): 695-703.
147. Touchette, D. R., S. Rao, P. K. Dhru, W. Zhao, Y. K. Choi, I. Bhandari and G. D. Stettin (2012). "Identification of and intervention to address therapeutic gaps in care." *Am J Manag Care* **18**(10): e364-371.
148. Valenza, J. A., D. Taylor, M. F. Walji and C. W. Johnson (2014). "Assessing the benefit of a personalized EHR-generated informed consent in a dental school setting." *J Dent Educ* **78**(8): 1182-1193.
149. van Engen-Verheul, M. M., N. F. de Keizer, S. N. van der Veer, H. M. Kemps, W. J. Scholte op Reimer, M. W. Jaspers and N. Peek (2014). "Evaluating the effect of a web-based quality improvement system with feedback and outreach visits on guideline concordance in the field of cardiac rehabilitation: rationale and study protocol." *Implement Sci* **9**: 780.
150. van Wyk, J. T., M. A. van Wijk, M. C. Sturkenboom, M. Mosseveld, P. W. Moorman and J. van der Lei (2008). "Electronic alerts versus on-demand decision support to improve dyslipidemia treatment: a cluster randomized controlled trial." *Circulation* **117**(3): 371-378.
151. Vidrine, J. I., S. Shete, Y. Cao, A. Greisinger, P. Harmonson, B. Sharp, L. Miles, S. M. Zbikowski and D. W. Wetter (2013). "Ask-Advise-Connect: a new approach to smoking treatment delivery in health care settings." *JAMA Intern Med* **173**(6): 458-464.
152. Vollmer, W. M., A. A. Owen-Smith, J. O. Tom, R. Laws, D. G. Ditmer, D. H. Smith, A. C. Waterbury, J. L. Schneider, C. H. Yonehara, A. Williams, S. Vupputuri and C. S. Rand (2014). "Improving adherence to cardiovascular disease medications with information technology." *Am J Manag Care* **20**(11 Spec No. 17): SP502-510.

153. Vrijens, B., A. Belmans, K. Matthys, E. de Klerk and E. Lesaffre (2006). "Effect of intervention through a pharmaceutical care program on patient adherence with prescribed once-daily atorvastatin." *Pharmacoepidemiol Drug Saf* **15**(2): 115-121.
154. Wack, M., E. Puymirat, B. Ranque, S. Georjin-Lavialle, I. Pierre, A. Tanguy, F. Ackermann, C. Mallet, J. Pavie, H. Boultache, P. Durieux and P. Avillach (2015). "Evaluating the Impact of Computerized Provider Order Entry on Medical Students Training at Bedside: A Randomized Controlled Trial." *PLoS One* **10**(9): e0138094.
155. Wagner, P. J., J. Dias, S. Howard, K. W. Kintziger, M. F. Hudson, Y. H. Seol and P. Sodomka (2012). "Personal health records and hypertension control: a randomized trial." *J Am Med Inform Assoc* **19**(4): 626-634.
156. Wald, H. L., B. Bandle, A. A. Richard, S. J. Min and E. Capezuti (2014). "A Trial of electronic surveillance feedback for quality improvement at Nurses Improving Care for Healthsystem Elders (NICHE) hospitals." *Am J Infect Control* **42**(10 Suppl): S250-256.
157. Walker, J., C. K. Fairley, S. M. Walker, L. C. Gurrin, J. M. Gunn, M. V. Pirotta, R. Carter and J. S. Hocking (2010). "Computer reminders for Chlamydia screening in general practice: a randomized controlled trial." *Sex Transm Dis* **37**(7): 445-450.
158. Wang, L., L. He, Y. Tao, L. Sun, H. Zheng, Y. Zheng, Y. Shen, S. Liu, Y. Zhao and Y. Wang (2017). "Evaluating a Web-Based Coaching Program Using Electronic Health Records for Patients With Chronic Obstructive Pulmonary Disease in China: Randomized Controlled Trial." *J Med Internet Res* **19**(7): e264.
159. Weber, V., A. White and R. McIlvried (2008). "An electronic medical record (EMR)-based intervention to reduce polypharmacy and falls in an ambulatory rural elderly population." *J Gen Intern Med* **23**(4): 399-404.
160. Weingart, S. N., A. Carbo, A. Tess, L. Chiappetta, S. Tutkus, L. Morway, M. Toth, R. B. Davis, R. S. Phillips and D. W. Bates (2013). "Using a patient internet portal to prevent adverse drug events: a randomized, controlled trial." *J Patient Saf* **9**(3): 169-175.
161. Weiss, C. H., D. Dibardino, J. Rho, N. Sung, B. Collander and R. G. Wunderink (2013). "A clinical trial comparing physician prompting with an unprompted automated electronic checklist to reduce empirical antibiotic utilization." *Crit Care Med* **41**(11): 2563-2569.
162. Were, M. C., C. Shen, W. M. Tierney, J. J. Mamlin, P. G. Biondich, X. Li, S. Kimaiyo and B. W. Mamlin (2011). "Evaluation of computer-generated reminders to improve CD4 laboratory monitoring in sub-Saharan Africa: a prospective comparative study." *J Am Med Inform Assoc* **18**(2): 150-155.
163. Whited, J. D., R. P. Hall, M. E. Foy, L. E. Marbrey, S. C. Grambow, T. K. Dudley, S. Datta, D. L. Simel and E. Z. Oddone (2002). "Teledermatology's impact on time to intervention among referrals to a dermatology consult service." *Telemed J E Health* **8**(3): 313-321.
164. Williams, L. K., E. L. Peterson, K. Wells, J. Campbell, M. Wang, V. K. Chowdhry, M. Walsh, R. Enberg, D. E. Lanfear and M. Pladevall (2010). "A cluster-randomized trial to provide clinicians inhaled corticosteroid adherence information for their patients with asthma." *J Allergy Clin Immunol* **126**(2): 225-231, 231 e221-224.
165. Wilson, F. P., M. Shashaty, J. Testani, I. Aqeel, Y. Borovskiy, S. S. Ellenberg, H. I. Feldman, H. Fernandez, Y. Gitelman, J. Lin, D. Negoianu, C. R. Parikh, P. P. Reese, R. Urbani and B. Fuchs (2015). "Automated, electronic alerts for acute kidney injury: a single-blind, parallel-group, randomised controlled trial." *Lancet* **385**(9981): 1966-1974.
166. Wood, J. and J. Finkelstein (2013). "Comparison of automated and manual vital sign collection at hospital wards." *Stud Health Technol Inform* **190**: 48-50.
167. Wright, A., J. Pang, J. C. Feblowitz, F. L. Maloney, A. R. Wilcox, K. S. McLoughlin, H. Ramelson, L. Schneider and D. W. Bates (2012). "Improving completeness of electronic problem lists through clinical decision support: a randomized, controlled trial." *J Am Med Inform Assoc* **19**(4): 555-561.
168. Wright, A., E. G. Poon, J. Wald, J. Feblowitz, J. E. Pang, J. L. Schnipper, R. W. Grant, T. K. Gandhi, L. A. Volk, A. Bloom, D. H. Williams, K. Gardner, M. Epstein, L. Nelson, A. Businger, Q. Li, D. W. Bates and B. Middleton (2012). "Randomized controlled trial of health maintenance reminders provided directly to patients through an electronic PHR." *J Gen Intern Med* **27**(1): 85-92.
169. Wright, A., E. G. Poon, J. Wald, J. L. Schnipper, R. Grant, T. K. Gandhi, L. A. Volk, A. Bloom, D. H. Williams, K. Gardner, M. Epstein, L. Nelson, A. Businger, Q. Li, D. W. Bates and B. Middleton (2008). "Effectiveness of health maintenance reminders provided directly to patients." *AMIA Annu Symp Proc*: 1183.
170. Yi, S. S., B. P. Tabaei, S. Y. Angell, A. Rapin, M. D. Buck, W. G. Pagano, F. J. Maselli, A. Simmons and S. Chamany (2015). "Self-blood pressure monitoring in an urban, ethnically diverse population: a randomized clinical trial utilizing the electronic health record." *Circ Cardiovasc Qual Outcomes* **8**(2): 138-145.
171. Zeiger, R. S., M. Schatz, Q. Li, P. G. Solari, J. L. Zazzali and W. Chen (2014). "Real-time asthma outreach reduces excessive short-acting beta2-agonist use: a randomized study." *J Allergy Clin Immunol Pract* **2**(4): 445-456, 456 e441-445.
172. Zera, C. A., D. W. Bates, A. M. Stuebe, J. L. Ecker and E. W. Seely (2015). "Diabetes Screening Reminder for Women With Prior Gestational Diabetes: A Randomized Controlled Trial." *Obstet Gynecol* **126**(1): 109-114.
